# Supplementary material for: Photocatalytic selective oxidation of the terminal methyl group of dodecane with molecular oxygen over atomically dispersed Ti in a mesoporous SiO2 matrix
Source: Royal Society of Chemistry journal article supplement (doi:10.1039/c3gc41343h), 2013-01-01
Supplement: c3gc41343h.pdf [file c3gc41343h.pdf]

## Electronic Supporting Information

### **Photocatalytic selective oxidation of terminal methyl group of dodecane with molecular oxygen over Ti atom dispersed mesoporous TiO<sub>2</sub>-SiO<sub>2</sub> mixed oxides**

Jae Yul Kim,<sup>a</sup> Ji-Wook Jang,<sup>a</sup> Duck Hyun Youn,<sup>a</sup> Eun Sun Kim,<sup>a</sup> Sun Hee Choi,<sup>b</sup> Tae Joo Shin<sup>b</sup> and Jae Sung Lee<sup>c\*</sup>

<sup>a</sup> Department of Chemical Engineering, Pohang University of Science and Technology, 77 Cheongam-ro, Nam-Gu, Pohang, Gyungbuk, 790-784, Republic of Korea.

<sup>b</sup> Pohang Accelerator Laboratory, Pohang University of Science and Technology, 77 Cheongam-ro, Nam-Gu, Pohang, Gyungbuk, 790-784, Republic of Korea.

<sup>c</sup> School of Nono-Bioscience and Chemical Engineering, Ulsan National Institute of Science & Technology, 50 UNIST-gil, Ulsan 689-798, Republic of Korea.

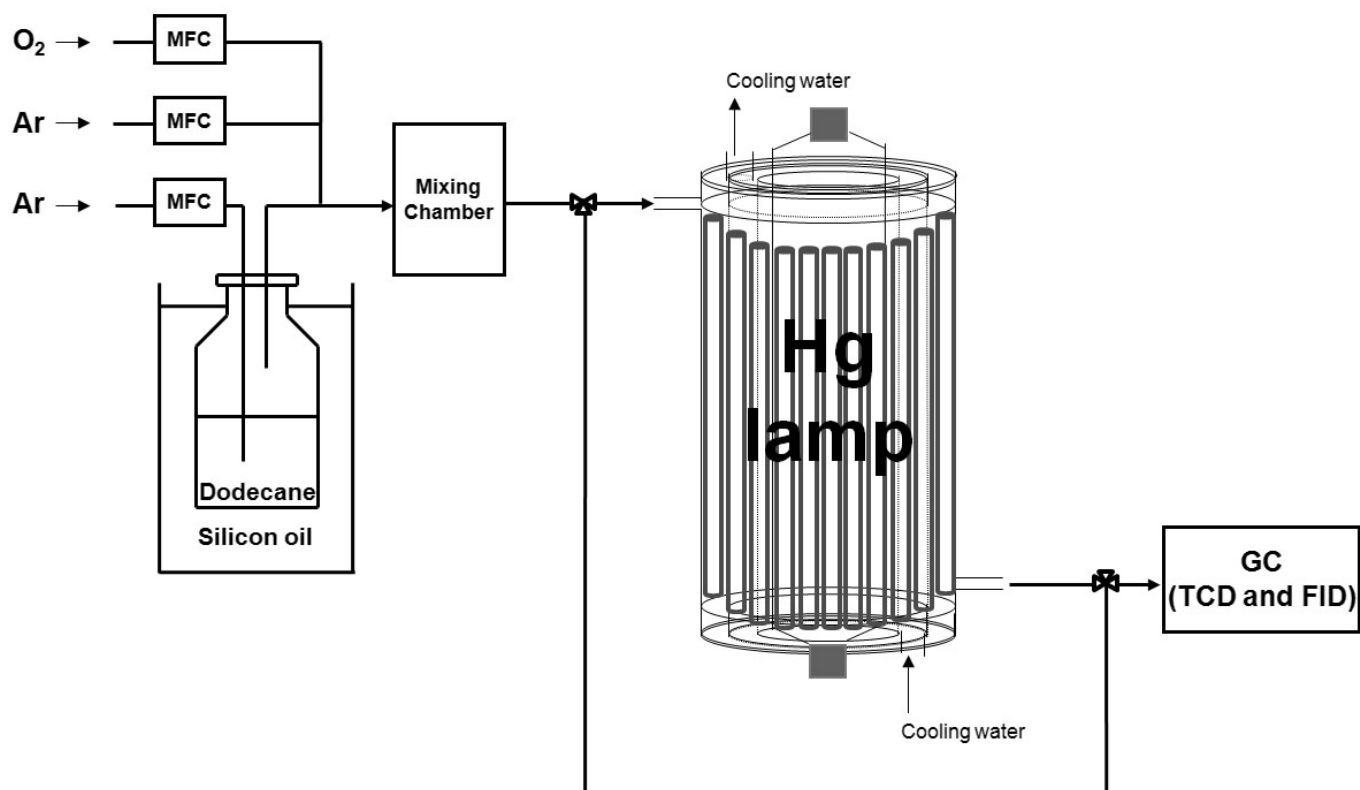

Fig. S1. A lab scale continuous flow system for photocatalytic partial oxidation of dodecane. Temperature of water for UV-Vis light cooling was 80 °C.

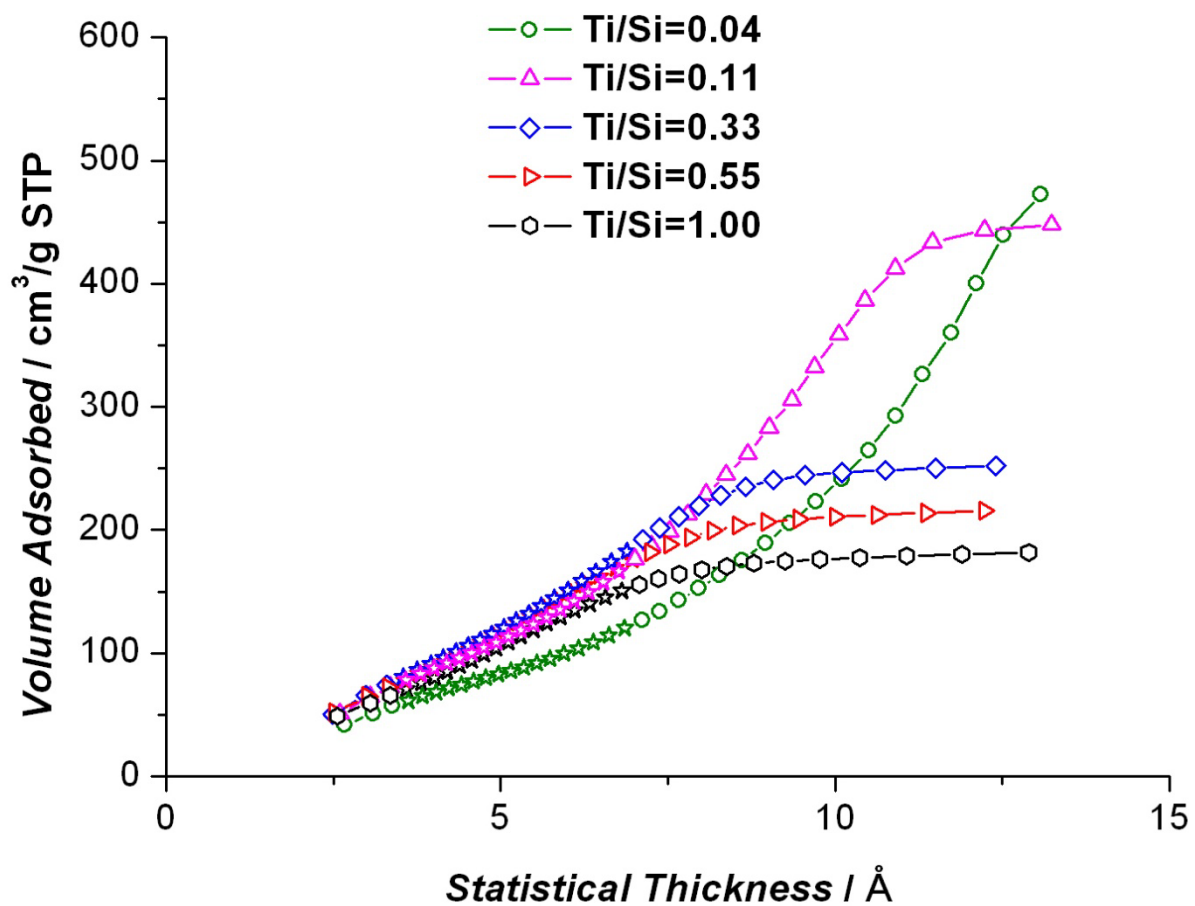

Fig. S2. Profiles based on t-plot method to investigate microporosity of TiO<sub>2</sub>-SiO<sub>2</sub> mixed oxide. ☆ indicates parameter ranges for extrapolation.

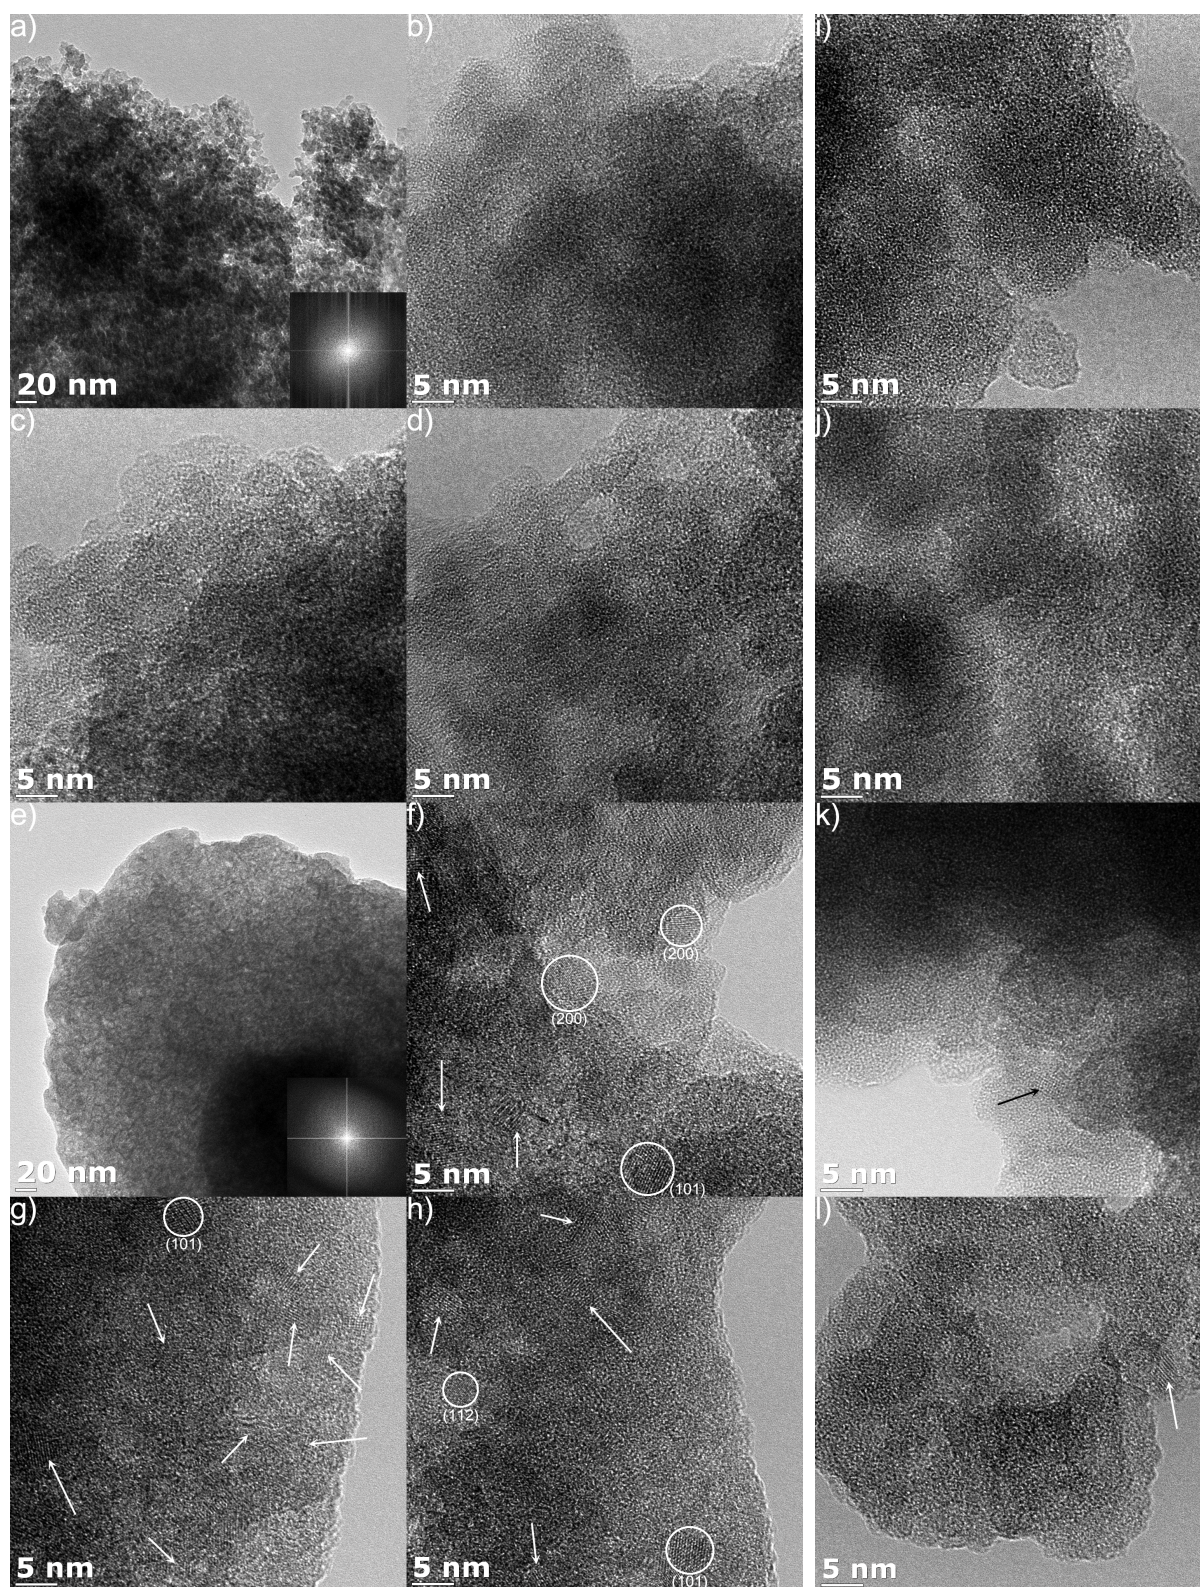

Fig. S3. HRTEM images picked out from more than 30 different spots of TiO<sub>2</sub>-SiO<sub>2</sub> mixed oxide with a-d) Ti/Si=0.11 and e-h) 1.00. Images of Ti/Si=0.04 and 0.33 are shown in i, j) and k, l). Circles and arrows indicate phase and lattice fringes of anatase TiO<sub>2</sub> and insets of a, e) represents SAED pattern.

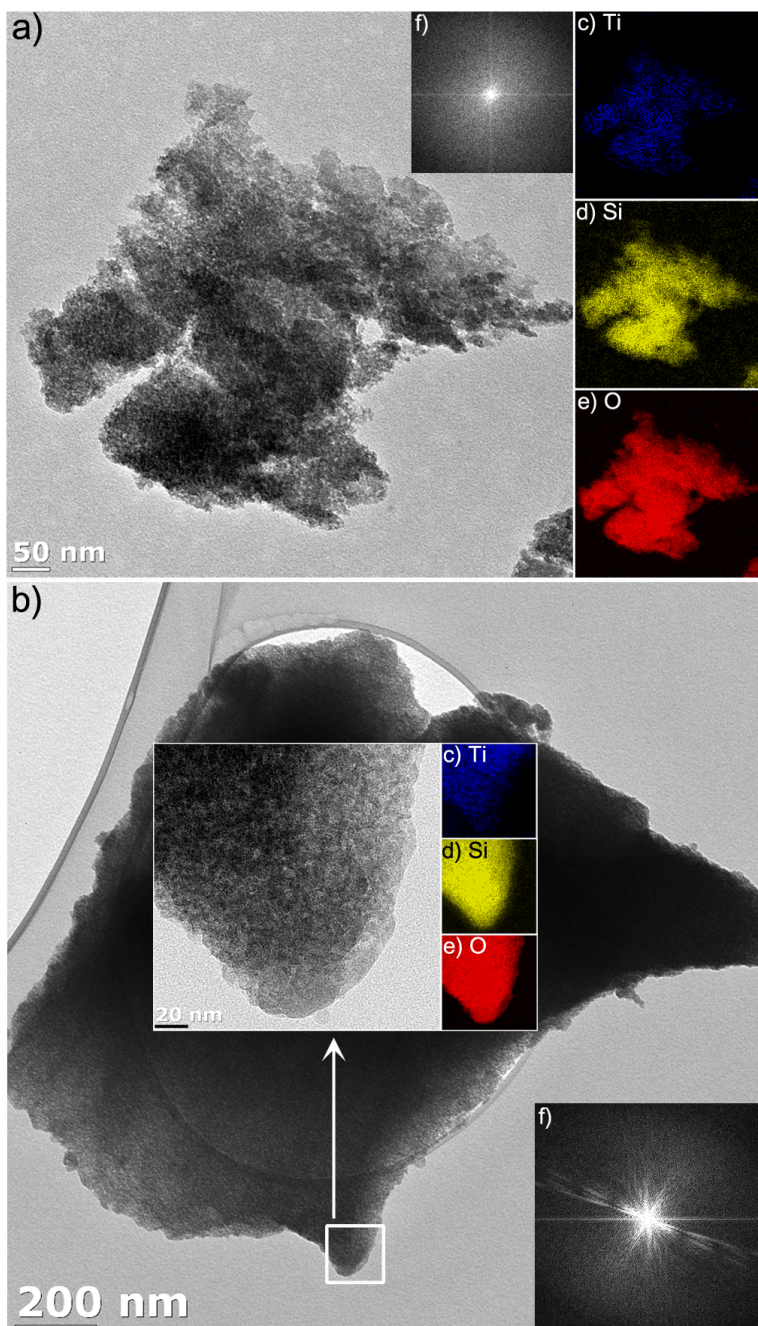

Fig. S4. TEM image of TiO<sub>2</sub>-SiO<sub>2</sub> mixed oxide with a) Ti/Si=0.11 and b) 0.33. c-e) EELS mapping of composed atoms. f) SAED pattern for both samples.

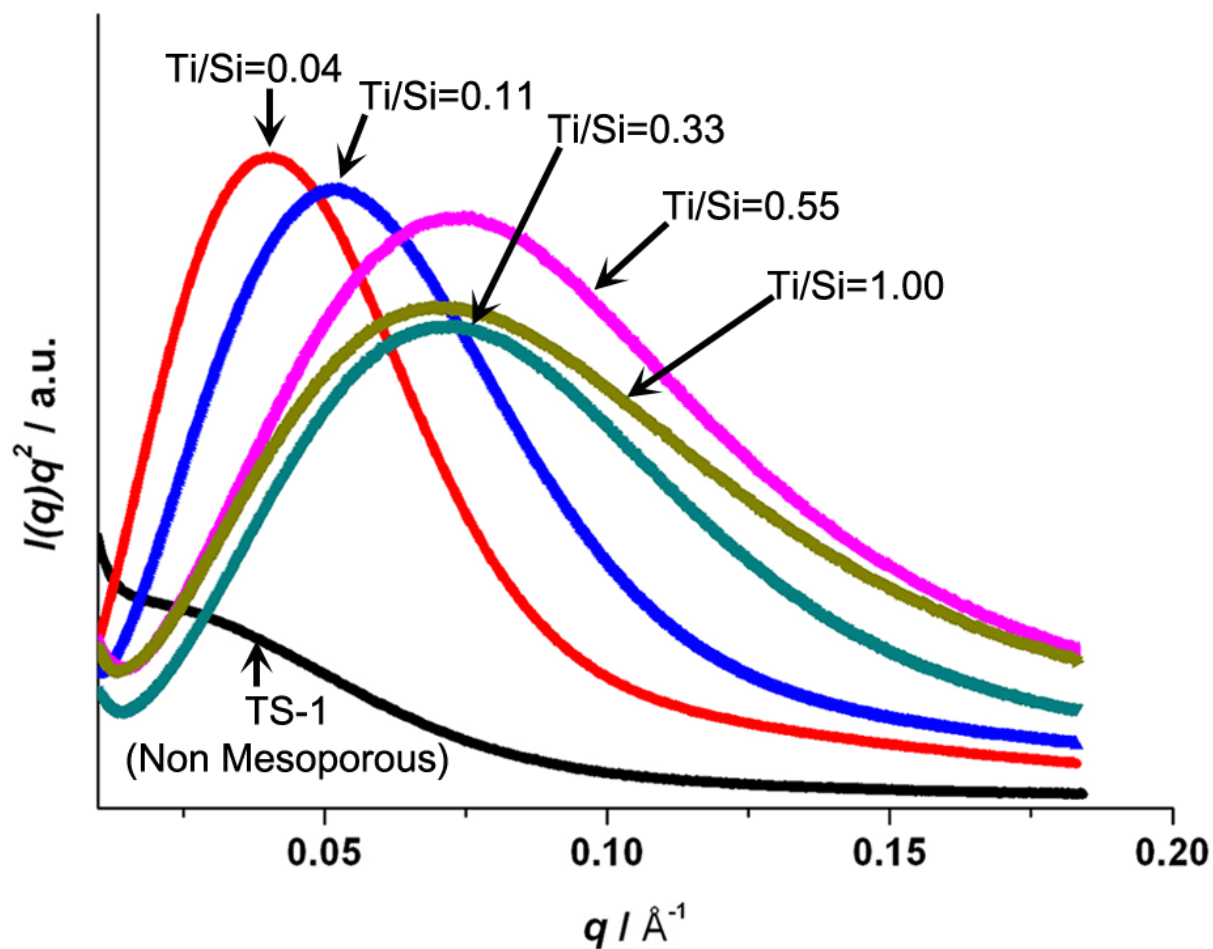

Fig. S5. Lorentz corrected SAXS profiles of series of  $\text{TiO}_2$ - $\text{SiO}_2$  mixed oxide and TS-1.

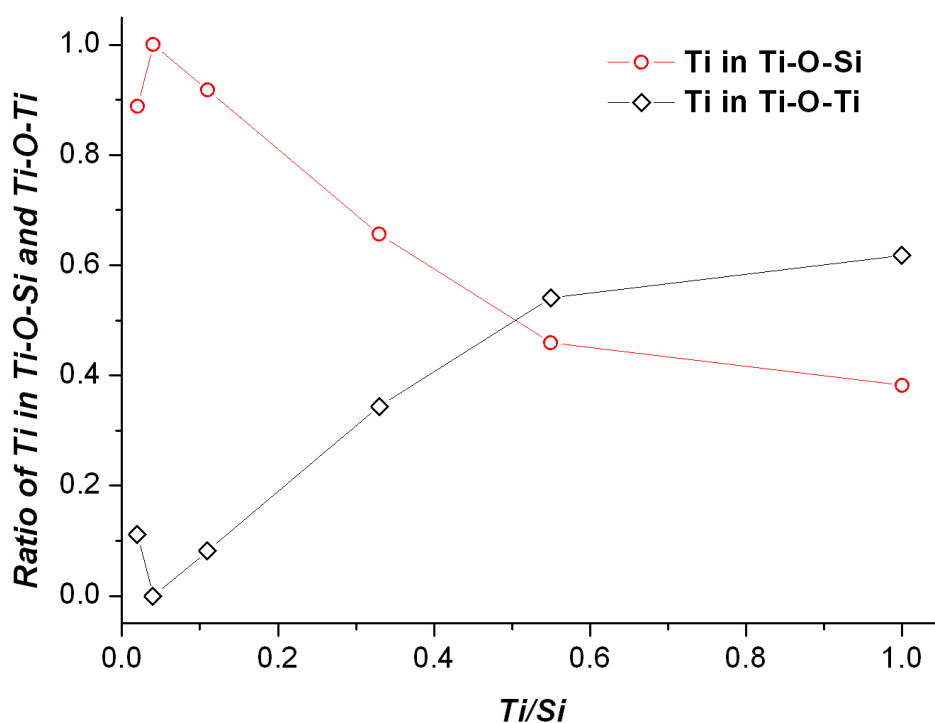

Fig. S6. Linear combination fitting of XANES of  $\text{TiO}_2\text{-SiO}_2$  mixed oxide. Because the intensity of pre-edge peak of sample with  $\text{Ti/Si}=0.02$  was smaller than that of one with 0.04 (Fig. 4) due to the octahedral hole formed when bridging O-Si bond is broken by oxide ion from O-Ti when low concentration of Ti are inserted to  $\text{SiO}_2$  glass matrix, XANES of the sample with  $\text{Ti/Si}=0.04$  and anatase  $\text{TiO}_2$  were selected as references spectra of maximum Ti-O-Si and Ti-O-Ti respectively after careful consideration. Fitting range was fixed from 4964.50 to 4976.03 eV to cover both singlet and triplet pre-edge peaks for all cases.

**Table S1**

**Results of preedge fitting for normalized concentration of Ti-O-Si (TOS) and Ti-O-Ti (TOT). [a]  $C_{TOS}$ ,  $C_{TOT}$ : Normalized concentration, [b]  $\Delta E_{TOS}$ ,  $\Delta E_{TOT}$ : Energy shift correction, [c]  $X_v^2$ : Reduced Chi-square, [d] R-factor: a measure of absolute misfit between data and theory.**

| Ti/Si | $C_{TOS}^{[a]}$<br>(Uncertainty) | $C_{TOT}^{[a]}$<br>(Uncertainty) | $\Delta E_{TOS}^{[b]}$<br>(Uncertainty) | $\Delta E_{TOT}^{[b]}$<br>(Uncertainty) | $X_v^2^{[c]}$ | R-factor <sup>[d]</sup> |
|-------|----------------------------------|----------------------------------|-----------------------------------------|-----------------------------------------|---------------|-------------------------|
| 0.02  | 0.888 (0.016)                    | 0.112 (0.016)                    | 0.205 (0.013)                           | 0.377 (0.325)                           | 0.0000159     | 0.015635                |
| 0.11  | 0.918 (0.007)                    | 0.082 (0.007)                    | 0.042 (0.005)                           | -0.112 (0.177)                          | 0.0000032     | 0.002959                |
| 0.33  | 0.656 (0.012)                    | 0.344 (0.012)                    | 0.010 (0.012)                           | -0.116 (0.073)                          | 0.0000097     | 0.016549                |
| 0.55  | 0.459 (0.013)                    | 0.541 (0.013)                    | 0.299 (0.017)                           | 0.028 (0.048)                           | 0.0000111     | 0.038137                |
| 1.00  | 0.382 (0.013)                    | 0.618 (0.013)                    | 0.210 (0.021)                           | -0.091 (0.042)                          | 0.0000116     | 0.050538                |



**Table S2. The OHC products identified by GC-MS<sup>[a]</sup>.**

| Aldehydes <sup>[b]</sup> |              | carboxylic acids <sup>[c]</sup> |                | Ketones <sup>[c]</sup> |             |
|--------------------------|--------------|---------------------------------|----------------|------------------------|-------------|
| RT (min)                 | Compound     | RT (min)                        | Compound       | RT (min)               | Compound    |
| 4.107                    | formaldehyde | 8.787                           | acetic acid    | 9.560                  | 2-butanone  |
| 5.000                    | acetaldehyde | 12.653                          | propanoic acid | 13.305                 | 2-pentanone |
| 6.773                    | propanal     | 18.058                          | butanoic acid  | 19.948                 | 2-hexanone  |
| 9.892                    | butanal      | 24.313                          | pentanoic acid | 25.926                 | 2-heptanone |
| 14.485                   | pentanal     | 30.630                          | hexanoic acid  | 33.145                 | 2-octanone  |
| 21.365                   | hexanal      | 37.248                          | heptanoic acid | 38.895                 | 2-nonanone  |
| 27.315                   | heptanal     | 41.316                          | ocatanoic acid | 42.586                 | 2-decanone  |
| 34.787                   | octanal      | 44.357                          | nonanoic acid  |                        |             |
| 40.054                   | nonanal      |                                 |                |                        |             |
| 43.594                   | decanal      |                                 |                |                        |             |

<sup>[a]</sup> Analyzed at a split ratio of 20<sup>[b]</sup> or 10<sup>[c]</sup>. Each product at a given retention time (RT) was identified by mass spectroscopy signals.
